# Supplementary material
Source: Research Square preprint supplement (doi:10.21203/rs.3.rs-9083519/v1)
Supplement: Supplementary file 1 [file 3794fc00216ec4e4745f55a4.pdf]

## Supporting Information

### **Mucosal-associated invariant T (MAIT) cells are reduced and dysfunctional in acute melioidosis**

Fazle Rabbi Chowdhury<sup>1,2,3,4</sup>, Martha Zewdie<sup>1,2</sup>, Priyanka Abraham<sup>1,2,4</sup>, Srija Moulik<sup>1,2</sup>, Hadiza Adebawale<sup>1,2</sup>, Jennifer Hill<sup>1,2</sup>, Md Robed Amin<sup>5,6</sup>, Lovely Barai<sup>7</sup>, Md Rokibul Hasan<sup>7</sup>, Ayako Kurioka<sup>1</sup>, Patpong Rongkard<sup>1,2</sup>, Direk Limmathurotsakul<sup>4,8</sup>, Nicholas PJ Day<sup>4</sup>, Parinya Chamnan<sup>9</sup>, Paul Klenerman<sup>1,10,11,12</sup>, Chris B Willberg<sup>1</sup>, Barbara Kronsteiner<sup>1,2,\*</sup>, Susanna J Dunachie<sup>1,2,4,10,\*</sup>

<sup>1</sup> Peter Medawar Building for Pathogen Research, University of Oxford, Oxford, United Kingdom.

<sup>2</sup> NDM Centre for Global Health Research, University of Oxford, Oxford, United Kingdom.

<sup>3</sup> Department of Internal Medicine, Bangladesh Medical University, Dhaka, Bangladesh

<sup>4</sup> Mahidol-Oxford Tropical Medicine Research Unit, Mahidol University, Bangkok, Thailand.

<sup>5</sup> Department of Medicine, Dhaka Medical College, Dhaka, Bangladesh

<sup>6</sup> Directorate General of Health Services, Dhaka, Bangladesh

<sup>7</sup> Department of Microbiology, BIRDEM General Hospital, Dhaka, Bangladesh

<sup>8</sup> Department of Tropical Hygiene, Faculty of Tropical Medicine, Mahidol University, Bangkok, Thailand

<sup>9</sup> Cardiometabolic Research Group, Sunpasitthiprasong Hospital, Ubon Ratchathani, Thailand

<sup>10</sup> Oxford University Hospitals NHS Foundation Trust, Oxford, UK

<sup>11</sup> Translational Gastroenterology Unit, University of Oxford, UK

<sup>12</sup> NIHR Oxford Biomedical Research Centre, University of Oxford, Oxford, UK

\*These authors contributed equally

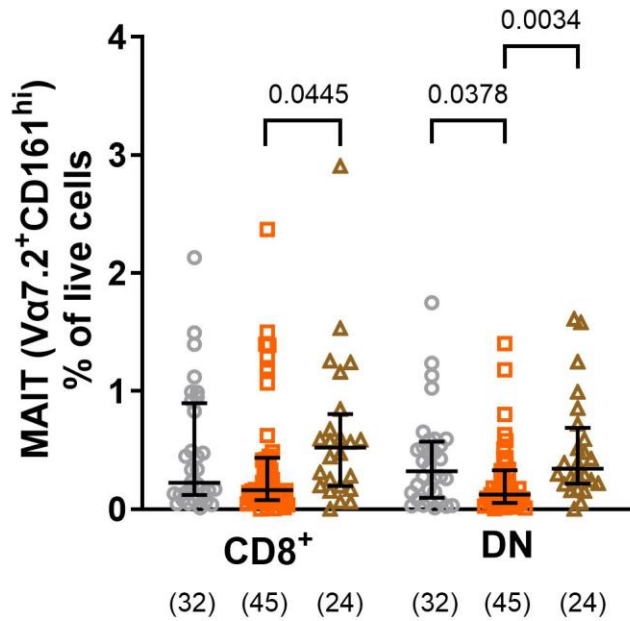

**Supplementary Figure 1.** MAIT cell frequency is reduced in acute melioidosis. Frequency of CD8<sup>+</sup> and double negative (DN) MAIT cells within live cells was compared between controls, acute melioidosis patients and those who had recovered from melioidosis (1 year post admission). Grey circles: controls, orange squares: acute patients, brown triangles: recovered patients. The number of biological replicates per group is given in brackets under graphs. A two-tailed p value of <0.05 was considered statistically significant. Exact p values <0.1 are displayed on graphs. The data are displayed as median and interquartile range. The three groups were compared using Kruskal Wallis test followed by Dunn's multiple comparison.

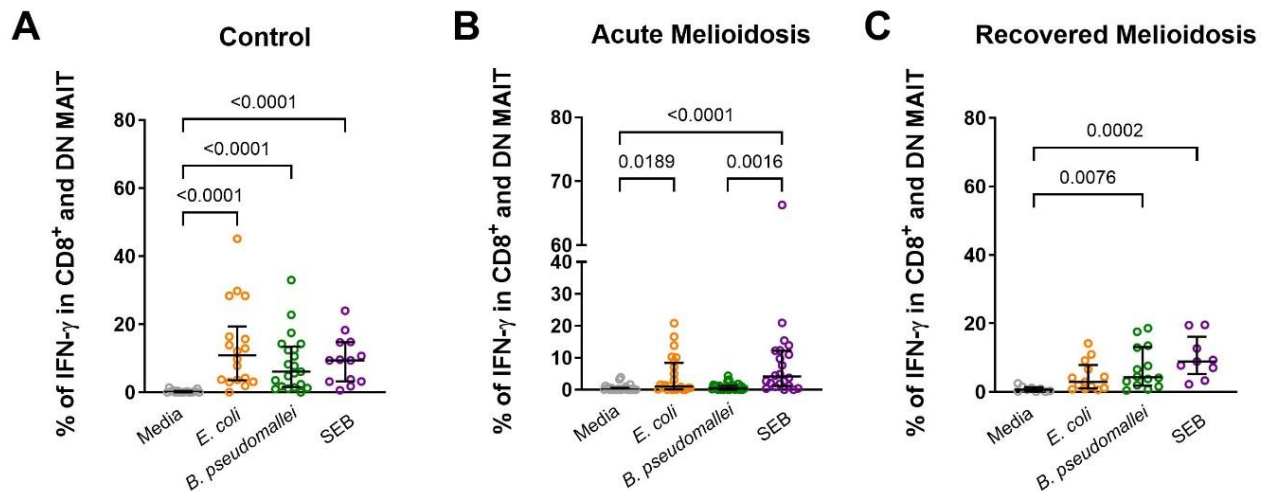

**Supplementary Figure 2.** MAIT cell function in melioidosis. Expression of IFN- $\gamma$  in MAIT cells (CD8<sup>+</sup> and DN) upon *in vitro* stimulation with fixed *E. coli*, *B. pseudomallei* (BP), staphylococcal enterotoxin B (SEB) and media was assessed in (A) healthy controls, (B) acute melioidosis patients and (C) those who had recovered from melioidosis (1 year post admission). A two-tailed p value of <math><0.05</math> was considered statistically significant. Exact p values <math><0.1</math> are displayed on graphs. The data are displayed as median and interquartile range. The four treatment groups were compared using Kruskal Wallis test followed by Dunn's multiple comparison.

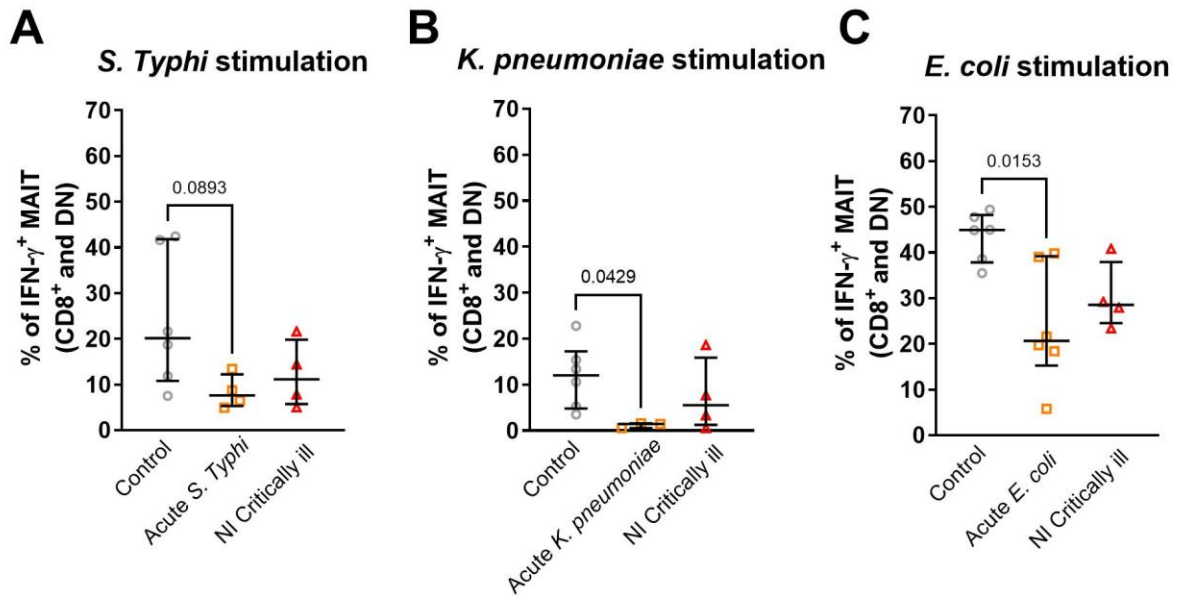

**Supplementary Figure 3.** Reduced MAIT function is common in Gram-negative sepsis. IFN- $\gamma$  expression in the combined CD8<sup>+</sup> and DN MAIT cell population was compared between patients with acute sepsis caused by different Gram-negative bacteria (*E. coli* n=6, *S. Typhi* n=4, *K. pneumoniae* n=3), healthy controls (n=6) and non-infectious (NI) critically ill cases (n=4) upon stimulation with the respective causative bacteria (fixed). A two-tailed p value of <0.05 was considered statistically significant. Exact p values <0.1 are displayed on graphs. The data are displayed as median and interquartile range. Three or more groups were compared using Kruskal Wallis test followed by Dunn's multiple comparison.

**Supplementary Table 1.** Details of antibodies used for flow cytometry experiments

| Marker | Fluorochrome | Clone    | Manufacturer      | Panel                                                  | Figure     |
|--------|--------------|----------|-------------------|--------------------------------------------------------|------------|
| CD3    | PE-Cy5       | UCHT1    | Biolegend         | Phenotyping<br>and MAIT<br>cytokine<br>secretion assay | Figure 2-4 |
| CD3    | eFluor450    | OKT3     | eBioscience       | MAIT<br>cytokine<br>secretion assay                    | Figure 1   |
| CD4    | V450         | L200     | BD<br>Biosciences | Phenotyping<br>and MAIT<br>cytokine<br>secretion assay | Figure 2-4 |
| CD4    | VioGreen     | VIT4     | Miltenyi Biotec   | MAIT<br>cytokine<br>secretion assay                    | Figure 1   |
| CD8    | BV510        | RPA-T8   | Biolegend         | Phenotyping<br>and MAIT<br>cytokine<br>secretion assay | Figure 2-4 |
| CD8    | PE-Vio770    | BW135/80 | Miltenyi Biotec   | MAIT<br>cytokine<br>secretion assay                    | Figure 1   |
| CD161  | PE           | 191B8    | Miltenyi Biotec   | Phenotyping<br>and MAIT                                | Figure 1-4 |

|                    |             |       |                 |                                                        |            |
|--------------------|-------------|-------|-----------------|--------------------------------------------------------|------------|
|                    |             |       |                 | cytokine<br>secretion assay                            |            |
| TCR V $\alpha$ 7.2 | APC         | 3C10  | Biologend       | Phenotyping<br>and MAIT<br>cytokine<br>secretion assay | Figure 1-4 |
| CD69               | PE-Vio770   | FN50  | Miltenyi Biotec | Phenotyping                                            | Figure 2-4 |
| GzmB               | FITC        | GB11  | Biologend       | Phenotyping                                            | Figure 2-4 |
| IFN- $\gamma$      | PE-Cy7      | 4S.B3 | Biologend       | MAIT<br>cytokine<br>secretion assay                    | Figure 2-4 |
| IFN- $\gamma$      | FITC        | 45-15 | Miltenyi Biotec | MAIT<br>cytokine<br>secretion assay                    | Figure 1   |
| TNF                | FITC        | MAB11 | eBioscience     | MAIT<br>cytokine<br>secretion assay                    | Figure 2-4 |
| TNF                | PerCP-Cy5.5 | MAB11 | Biologend       | MAIT<br>cytokine<br>secretion assay                    | Figure 1   |

**Supplementary Table 2.** Demographic and clinical characteristics of acute melioidosis patients who survived and died within 28-days of admission

|                          | <b>Survived<br/>N=30</b> | <b>Died<br/>N=25</b> | <b>p-value*</b> |
|--------------------------|--------------------------|----------------------|-----------------|
| <b>Age, years</b>        |                          |                      | 0.13            |
| Median age               | 63                       | 57                   |                 |
| Age range                | 44-80                    | 33-84                |                 |
| Interquartile range      | 53-70                    | 50-62                |                 |
| <b>Sex, n (%)</b>        |                          |                      | 0.3             |
| Female                   | 7 (23%)                  | 9 (36%)              |                 |
| Male                     | 23 (77%)                 | 16 (64%)             |                 |
| <b>DM Status, n (%)</b>  |                          |                      | 0.55            |
| DM                       | 18 (60%)                 | 13 (52%)             |                 |
| Non-DM                   | 12 (40%)                 | 12 (48%)             |                 |
| <b>Bacteremic, n (%)</b> | 15 (50%)                 | 24 (96%)             | <0.001          |

\*Pearson Chi-Squared test; Mann-Whitney U test; Fisher's exact test

**Supplementary Table 3.** Demographic and clinical characteristics of acute melioidosis patients with and without DM

|                                           | <b>DM<br/>N=31</b> | <b>Non-DM<br/>N=24</b> | <b>p-value*</b> |
|-------------------------------------------|--------------------|------------------------|-----------------|
| <b>Age</b>                                |                    |                        | 0.021           |
| Median age                                | 57                 | 63                     |                 |
| Age range                                 | 43-80              | 33-84                  |                 |
| Interquartile range                       | 49-62              | 57-71                  |                 |
| <b>Sex, n (%)</b>                         |                    |                        | 0.074           |
| Female                                    | 12 (39%)           | 4 (17%)                |                 |
| Male                                      | 19 (61%)           | 20 (83%)               |                 |
| <b>28-Day Mortality, n (%)</b>            |                    |                        | 0.55            |
| Survived                                  | 18 (58%)           | 12 (50%)               |                 |
| Died                                      | 13 (42%)           | 12 (50%)               |                 |
| <b>History of renal impairment, n (%)</b> | 6 (19%)            | 5 (31%)                | 0.47            |
| <b>HbA1c</b>                              |                    |                        | <0.001          |
| Median (Q1-Q3)                            | 11.10 (8.6-12.6)   | 5.8 (5.3- 6.2)         |                 |

\*Pearson Chi-Squared test; Mann Whitney U test; Fisher's exact test
